# Supplementary material for: Impacts on microbial communities in sediments by aquaculture farming during one salmon cycle
Source: Frontiers journal article supplement (doi:10.3389/fmars.2024.1266410), 2024-08-09
Supplement: Data_Sheet_1.PDF [file Data_Sheet_1.PDF]

## *Supplementary Material*

### **Impacts on microbial communities in sediments by aquaculture farms**

**Bjarta O. Johansen<sup>1,2\*</sup>, Svein-Ole Mikalsen<sup>2</sup>, Eyðfinn Magnussen<sup>2</sup> Esbern J. Patursson<sup>3</sup>, Gunnvør á Norði<sup>4</sup>, Anni Djurhuus<sup>2\*</sup>**

<sup>1</sup>SMJ, Hoyvíksvegur 5, 100 Tórshavn, Faroe Islands

<sup>2</sup>Faculty of Science and Technology, University of the Faroe Islands, Vestara Bryggja 15, 100 Tórshavn, Faroe Islands

<sup>3</sup>Hiddenfjord, P/F Luna, Á Fútakletti, 360 Sandavágur, Faroe Islands

<sup>4</sup>Firum, Við Áir 11, 430 Hvalvík, Faroe Islands

**\* Correspondence:**

Bjarta Osberg Johansen

[objarta@gmail.com](mailto:objarta@gmail.com)

Anni Djurhuus

[Anni.djurhuus@gmail.com](mailto:Anni.djurhuus@gmail.com)

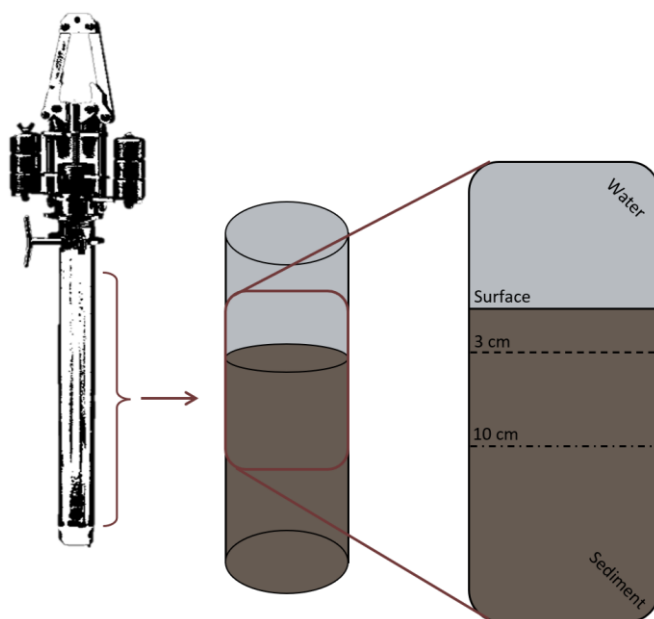

**Supplementary file 1:** Sketch of the kayak corer used for sampling (to the left) and tube with the selected sediment layers in cm (to the right).

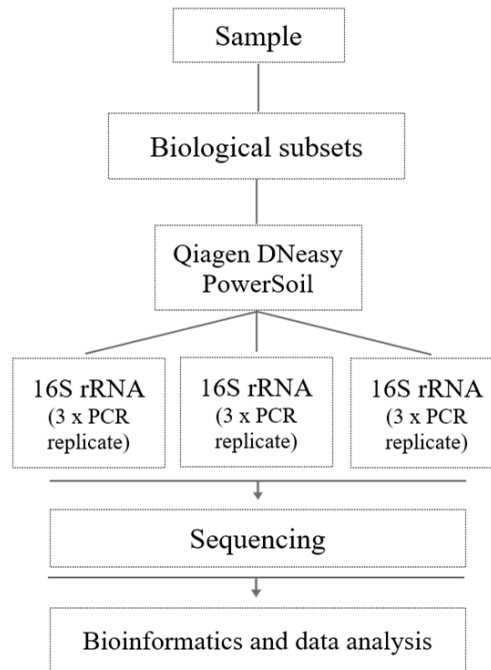

**Supplementary file 2:** Schematic of sampling and laboratory protocols. Amplification targeted the V4-V5 gene region of the taxonomic group of the 16S rRNA of microorganisms.

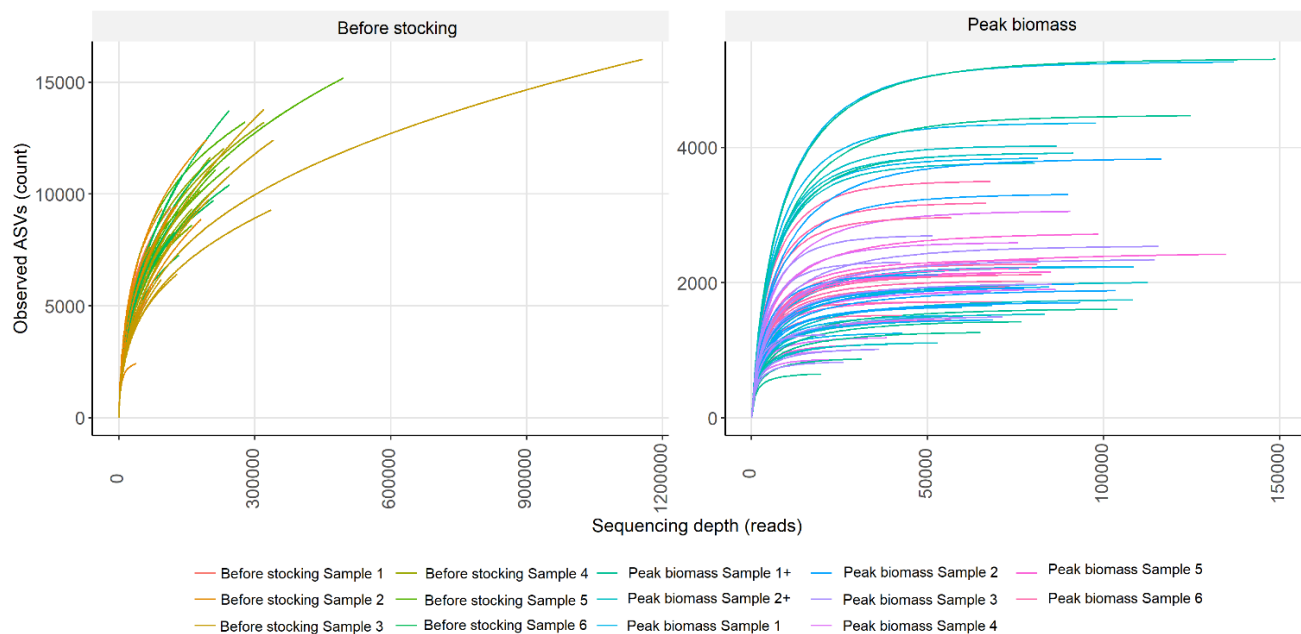

**Supplementary file 3:** Rarefaction curve of both sampling sets. 'Before stocking' sampling to the left and 'peak biomass' sampling at the right. A 10x difference in scale is between the two sampling sets.

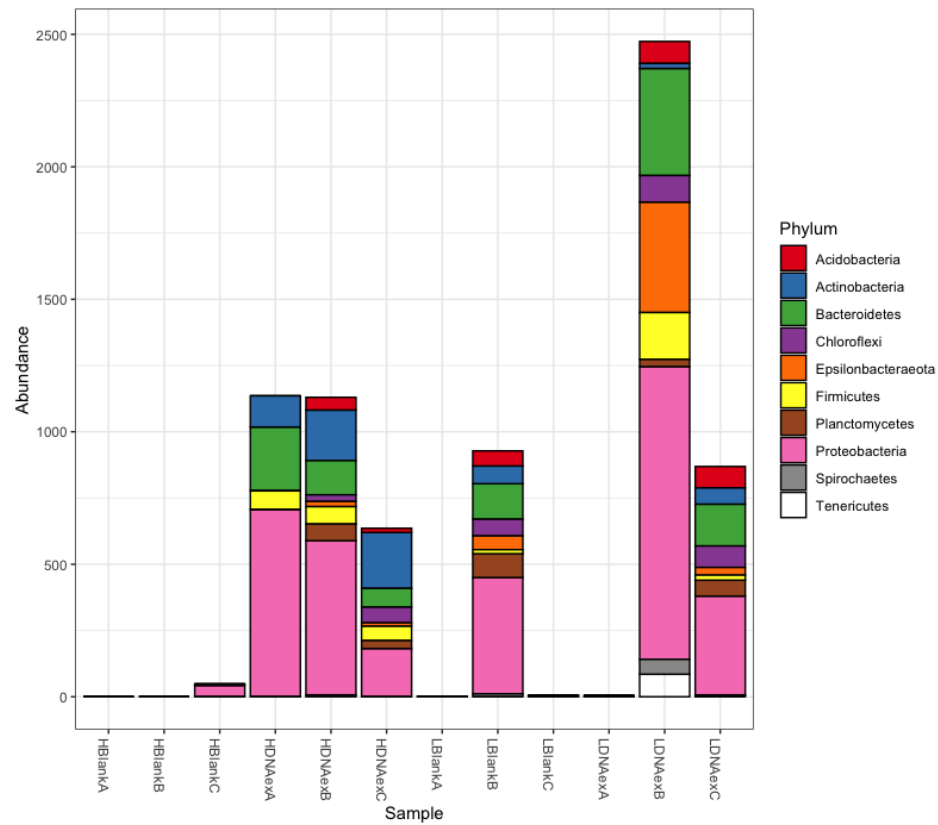

**Supplementary file 4:** Bar plot depicting sequence abundance in all negative controls (no template controls and DNA extraction negatives).

|                 | BS<br>Sample<br>1 | BS<br>Sample<br>2 | BS<br>Sample<br>3 | BS<br>Sample<br>4 | BS<br>Sample<br>5 | BS<br>Sample<br>6 | PB<br>Sample<br>1 | PB<br>Sample<br>1+ | PB<br>Sample<br>2 | PB<br>Sample<br>2+ | PB<br>Sample<br>3 | PB<br>Sample<br>4 | PB<br>Sample<br>5 |
|-----------------|-------------------|-------------------|-------------------|-------------------|-------------------|-------------------|-------------------|--------------------|-------------------|--------------------|-------------------|-------------------|-------------------|
| BS<br>Sample 2  | 0.12547           | -                 | -                 | -                 | -                 | -                 | -                 | -                  | -                 | -                  | -                 | -                 | -                 |
| BS<br>Sample 3  | 0.01387           | 0.67107           | -                 | -                 | -                 | -                 | -                 | -                  | -                 | -                  | -                 | -                 | -                 |
| BS<br>Sample 4  | 0.00337           | 0.56667           | 0.95236           | -                 | -                 | -                 | -                 | -                  | -                 | -                  | -                 | -                 | -                 |
| BS<br>Sample 5  | 0.00066           | 0.22553           | 0.56717           | 0.61858           | -                 | -                 | -                 | -                  | -                 | -                  | -                 | -                 | -                 |
| BS<br>Sample 6  | 0.03283           | 0.51854           | 1.0000            | 0.95236           | 0.68064           | -                 | -                 | -                  | -                 | -                  | -                 | -                 | -                 |
| PB<br>Sample 1  | 0.00234           | 0.00114           | 0.00013           | 0.00013           | 0.00013           | 0.00066           | -                 | -                  | -                 | -                  | -                 | -                 | -                 |
| PB<br>Sample 1+ | 0.00337           | 0.00114           | 0.00013           | 0.00013           | 0.00013           | 0.00066           | 0.42947           | -                  | -                 | -                  | -                 | -                 | -                 |
| PB<br>Sample 2  | 0.00013           | 0.00071           | 0.00013           | 0.00013           | 0.00013           | 0.00021           | 0.61858           | 0.42947            | -                 | -                  | -                 | -                 | -                 |
| PB<br>Sample 2+ | 0.00021           | 0.00114           | 0.00013           | 0.00013           | 0.00013           | 0.00066           | 0.52496           | 0.67746            | 0.79131           | -                  | -                 | -                 | -                 |
| PB<br>Sample 3  | 0.00013           | 0.00071           | 0.00013           | 0.00013           | 0.00013           | 0.00013           | 0.48359           | 0.91350            | 0.68064           | 0.68064            | -                 | -                 | -                 |
| PB<br>Sample 4  | 0.00021           | 0.00120           | 0.00021           | 0.00021           | 0.00021           | 0.00021           | 0.15341           | 0.92920            | 0.26689           | 0.41950            | 0.68064           | -                 | -                 |
| PB<br>Sample 5  | 0.00013           | 0.00042           | 0.00013           | 0.00013           | 0.00013           | 0.00013           | 0.68064           | 0.56717            | 0.73071           | 0.91350            | 0.73071           | 0.41950           | -                 |
| PB<br>Sample 6  | 0.00013           | 0.00114           | 0.00013           | 0.00013           | 0.00013           | 0.00013           | 1.0000            | 0.42947            | 0.52496           | 0.67107            | 0.40492           | 0.12547           | 0.67746           |

**Supplementary file 5:** Results of the Wilcoxon rank sum test for the post-hoc analysis. Samples who were significantly different from one another ( $p < 0.001$ , 0.01 and 0.05) are highlighted in yellow. BS = before stocking. PB = peak biomass.

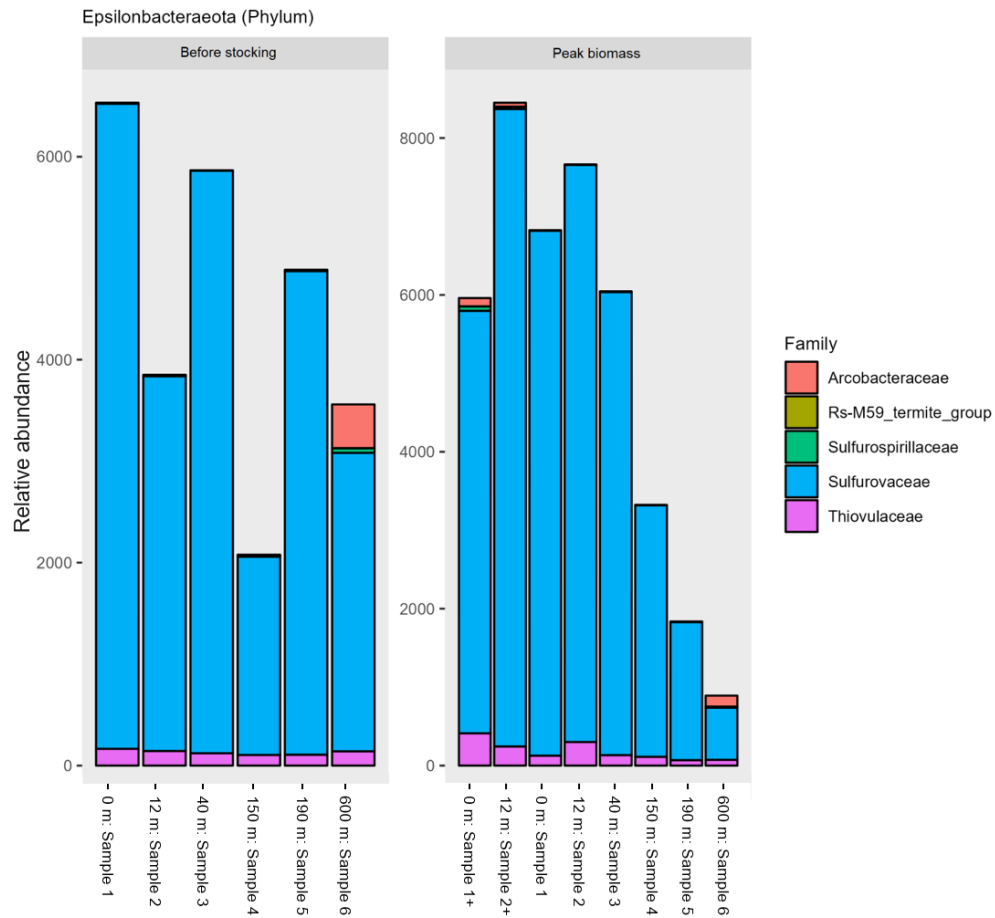

**Supplementary file 6:** Relative abundance barplot (>19,000 reads/sample) of the phylum Epsilonbacteraeota. Before stocking (left) and peak biomass (right). X-axis show the distance from the cages and the y-axis show a quantitative display of the relative abundances.

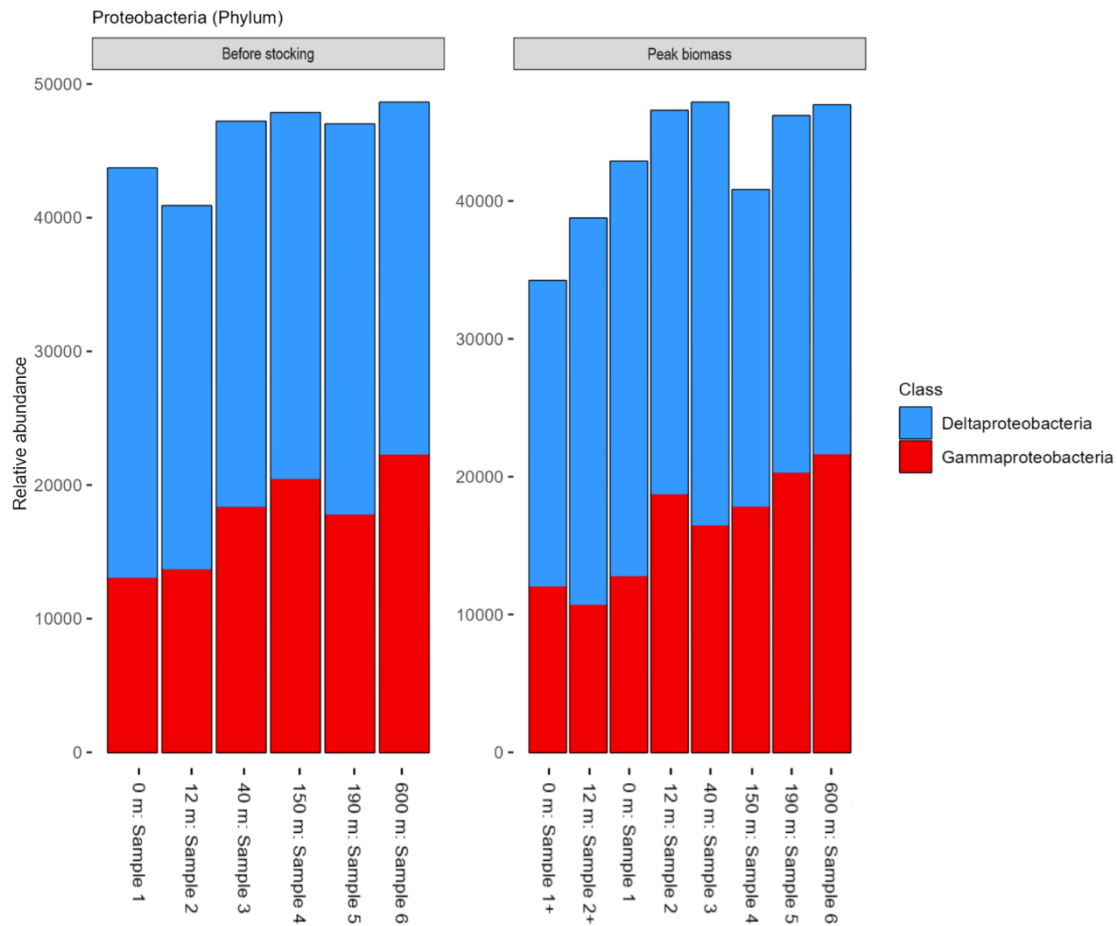

**Supplementary file 7:** Relative abundance barplot (>19,000 reads/sample) of the phylum of Proteobacteria showing the classes Deltaproteobacteria (blue) and Gammaproteobacteria (red). Before stocking (left) and peak biomass (right). X-axis show the distance from the cages and the y-axis show a quantitative display of the relative abundances.

|                                             | Before stocking |           |           |           |           |           | High biomass |           |           |           |           |           |           |           |
|---------------------------------------------|-----------------|-----------|-----------|-----------|-----------|-----------|--------------|-----------|-----------|-----------|-----------|-----------|-----------|-----------|
| Deltaproteobacteria; Desulfobulbaceae       | 10.9            | 9.5       | 11.9      | 8.7       | 9.3       | 9.2       | 6.6          | 8.2       | 7.8       | 9.2       | 8.5       | 8.9       | 8.1       | 7         |
| Deltaproteobacteria; Desulfobacteraceae     | 6.6             | 7.2       | 5.5       | 5.4       | 6.5       | 5.5       | 6.8          | 6.7       | 6.8       | 6.5       | 7         | 7.1       | 5.3       | 5         |
| Planctomycetacia; Pirellulaceae             | 5.9             | 5.4       | 8         | 6.7       | 5.9       | 6         | 2.1          | 3.9       | 3.7       | 5.3       | 4.3       | 5.8       | 6         | 4.2       |
| Bacteroidia; Flavobacteriaceae              | 3.1             | 3.5       | 5.4       | 3.9       | 4         | 5.5       | 4.4          | 3.3       | 4         | 4.4       | 3.5       | 3.2       | 5.2       | 5.8       |
| Thermoanaerobaculia; Thermoanaerobaculaceae | 3.9             | 4         | 3.8       | 5.1       | 4.3       | 4.8       | 1.9          | 3.2       | 3         | 4         | 3.5       | 4.7       | 4.8       | 2.9       |
| Campylobacteria; Sulfurovaceae              | 4.6             | 3         | 4         | 1.4       | 3.4       | 2.1       | 4.6          | 5.7       | 4.5       | 5.1       | 4         | 2.7       | 1.2       | 0.4       |
| Gammaproteobacteria; Unknown_Family         | 1.6             | 1.6       | 3.4       | 3.2       | 2.4       | 3.6       | 0.6          | 0.8       | 1.2       | 2.3       | 1.6       | 2.8       | 2.9       | 2.2       |
| Gammaproteobacteria; Halieaceae             | 1.5             | 2         | 3.3       | 3         | 2.3       | 2.4       | 0.7          | 0.8       | 1.4       | 2.4       | 1.9       | 2.5       | 2.7       | 2.4       |
| Bacteroidia; Bacteroidetes_BD2-2            | 3.1             | 2.6       | 1.8       | 1.4       | 2.4       | 1.5       | 2            | 2.8       | 2.5       | 2.4       | 2.2       | 1.7       | 1.3       | 1.2       |
| Anaerolineae; Anaerolineaceae               | 2               | 1.9       | 1.1       | 2.4       | 2.1       | 1.7       | 1.3          | 1.6       | 2.4       | 1.2       | 1.8       | 1.4       | 1.6       | 1.8       |
| Acidimicrobia; Illumatobacteraceae          | 1.3             | 1.2       | 2         | 1.8       | 1.4       | 1.4       | 0.5          | 0.7       | 0.9       | 1.4       | 1.2       | 1.6       | 2.3       | 2.2       |
| Bacteroidia; Lentimicrobiaceae              | 2               | 1.7       | 1.7       | 0.8       | 1.2       | 0.8       | 1.2          | 1.7       | 1.4       | 1.5       | 1.2       | 1         | 0.8       | 0.5       |
| Gammaproteobacteria; Thiomicrospiraceae     | 1.1             | 1.2       | 1.2       | 1         | 1.6       | 1.3       | 1.2          | 0.9       | 1.1       | 1.7       | 1.4       | 2.1       | 1         | 0.4       |
| Spirochaetia; Spirochaetaceae               | 0.9             | 0.8       | 0.2       | 0.3       | 0.6       | 0.4       | 7.2          | 2.6       | 0.8       | 0.8       | 0.7       | 0.6       | 0.5       | 0.6       |
| Gammaproteobacteria; Sedimenticolaceae      | 0.8             | 0.8       | 1.2       | 1.1       | 1.2       | 1.4       | 0.7          | 1.2       | 0.9       | 1.6       | 1.2       | 1.8       | 1.2       | 0.4       |
| Gammaproteobacteria; Spongiibacteraceae     | 0.9             | 1.6       | 1.4       | 1.3       | 1         | 1.2       | 0.3          | 0.3       | 0.9       | 1         | 1.2       | 1.2       | 1         | 1.1       |
| Kiritimatiellae; Kiritimatiellaceae         | 1               | 1         | 0.7       | 0.6       | 0.7       | 0.8       | 1            | 1.4       | 1.2       | 1.4       | 1.1       | 1         | 1.2       | 1         |
| Bacteroidia; Cyclobacteriaceae              | 0.5             | 0.7       | 0.9       | 1.1       | 1         | 1         | 0.2          | 0.3       | 0.6       | 0.8       | 0.7       | 0.9       | 1.3       | 1         |
| Anaerolineae; Caldilineaceae                | 0.9             | 0.8       | 1.1       | 0.8       | 0.9       | 0.8       | 0.4          | 0.8       | 0.7       | 0.8       | 0.7       | 0.8       | 0.8       | 0.5       |
| Bacteroidia; Prolixibacteraceae             | 1.2             | 1.4       | 0.8       | 0.3       | 0.6       | 0.4       | 1.5          | 1.1       | 0.7       | 0.8       | 0.6       | 0.4       | 0.3       | 0.9       |
| Gammaproteobacteria; Thiotrichaceae         | 0.5             | 0.6       | 0.3       | 0.8       | 0.8       | 1.4       | 0.5          | 0.5       | 0.6       | 0.9       | 0.7       | 1.2       | 0.9       | 0.7       |
| Deltaproteobacteria; Sandaracinaceae        | 0.6             | 0.6       | 0.9       | 1         | 0.7       | 1         | 0.3          | 0.3       | 0.6       | 0.7       | 0.7       | 0.9       | 1.1       | 0.8       |
| Gammaproteobacteria; Ectothiorhodospiraceae | 0.6             | 0.5       | 0.7       | 0.9       | 0.7       | 0.8       | 0.5          | 0.4       | 0.7       | 0.9       | 0.9       | 1.1       | 0.9       | 0.6       |
| Deltaproteobacteria; Desulfarculaceae       | 0.6             | 0.7       | 0.4       | 0.6       | 0.7       | 0.5       | 0.5          | 0.7       | 0.8       | 0.5       | 0.6       | 0.7       | 0.5       | 0.5       |
| Bacteroidia; Marinifilaceae                 | 0.1             | 0.1       | 0.1       | 0         | 0.1       | 0.3       | 4.6          | 1.9       | 0.1       | 0.2       | 0.1       | 0.2       | 0.2       | 0.3       |
| Deltaproteobacteria; Syntrophobacteraceae   | 0.6             | 0.6       | 0.2       | 0.6       | 0.4       | 0.3       | 0.3          | 0.6       | 1         | 0.5       | 1         | 0.4       | 0.4       | 0.6       |
| Thermoleophilia; 67-14                      | 0.5             | 0.5       | 0.5       | 0.7       | 0.4       | 0.5       | 0.3          | 0.3       | 0.6       | 0.5       | 0.6       | 0.6       | 0.6       | 0.7       |
| Verrucomicrobiae; Rubritaleaceae            | 0.3             | 0.3       | 0.6       | 0.5       | 0.4       | 0.5       | 0.2          | 0.3       | 0.5       | 0.7       | 0.6       | 0.5       | 0.9       | 0.7       |
| Alphaproteobacteria; Rhodobacteraceae       | 0.5             | 0.5       | 0.7       | 0.7       | 0.5       | 0.8       | 0.2          | 0.2       | 0.2       | 0.4       | 0.3       | 0.4       | 0.8       | 0.7       |
| Gammaproteobacteria; Psychromonadaceae      | 0.1             | 0.1       | 0         | 0.1       | 0.1       | 0.9       | 2.4          | 1.2       | 0.1       | 0.2       | 0.3       | 0.2       | 0.3       | 0.9       |
| Alphaproteobacteria; Methyloiligellaceae    | 0.5             | 0.5       | 0.5       | 0.6       | 0.4       | 0.5       | 0.2          | 0.3       | 0.6       | 0.4       | 0.7       | 0.4       | 0.5       | 0.5       |
| Acidimicrobia; Microtrichaceae              | 0.5             | 0.5       | 0.5       | 0.6       | 0.5       | 0.5       | 0.2          | 0.2       | 0.4       | 0.4       | 0.4       | 0.5       | 0.6       | 0.7       |
| Phycisphaerae; SG8-4                        | 0.3             | 0.3       | 0.1       | 0.3       | 0.3       | 0.3       | 0.8          | 0.6       | 0.9       | 0.4       | 0.7       | 0.3       | 0.2       | 0.6       |
| Calditrichia; Calditrichaceae               | 0.4             | 0.4       | 0.1       | 0.3       | 0.4       | 0.5       | 0.5          | 0.5       | 0.6       | 0.3       | 0.6       | 0.4       | 0.4       | 0.6       |
| Gammaproteobacteria; Chromatiaceae          | 0.3             | 0.3       | 0.4       | 0.4       | 0.5       | 0.5       | 0.3          | 0.2       | 0.3       | 0.5       | 0.5       | 0.8       | 0.5       | 0.2       |
| Bacteroidia; Crocinomicaceae                | 0.2             | 0.3       | 0.6       | 0.5       | 0.3       | 0.6       | 0.1          | 0.1       | 0.3       | 0.4       | 0.4       | 0.3       | 0.6       | 0.4       |
| Alphaproteobacteria; Hyphomicrobiaceae      | 0.3             | 0.4       | 0.3       | 0.4       | 0.3       | 0.3       | 0.2          | 0.4       | 0.6       | 0.3       | 0.6       | 0.3       | 0.3       | 0.4       |
| Latescibacteria; Latescibacteraceae         | 0.4             | 0.4       | 0.1       | 0.4       | 0.4       | 0.3       | 0.3          | 0.5       | 0.4       | 0.3       | 0.3       | 0.4       | 0.3       | 0.4       |
| Gammaproteobacteria; Colwelliaceae          | 0               | 0.1       | 0         | 0         | 0         | 0.3       | 0            | 0         | 0         | 0.2       | 0.2       | 0.2       | 0.5       | 3.1       |
| Verrucomicrobiae; DEV007                    | 0.3             | 0.3       | 0.6       | 0.5       | 0.4       | 0.5       | 0.1          | 0.1       | 0.1       | 0.2       | 0.2       | 0.3       | 0.4       | 0.3       |
| Bacteroidia; Marinilabiliaceae              | 0.4             | 0.3       | 0.1       | 0.2       | 0.3       | 0.2       | 0.7          | 0.5       | 0.2       | 0.3       | 0.2       | 0.2       | 0.2       | 0.3       |
| Deltaproteobacteria; Sva1033                | 0.2             | 0.2       | 0.4       | 0.4       | 0.3       | 0.4       | 0.1          | 0.1       | 0.1       | 0.3       | 0.2       | 0.3       | 0.5       | 0.4       |
| Gammaproteobacteria; Thiohalorhabdaceae     | 0.3             | 0.3       | 0.2       | 0.4       | 0.4       | 0.4       | 0.1          | 0.1       | 0.1       | 0.1       | 0.1       | 0.1       | 0.3       | 0.5       |
| Clostridia; Lachnospiraceae                 | 0.1             | 0.1       | 0         | 0.1       | 0.1       | 0.3       | 1.4          | 0.6       | 0.1       | 0.1       | 0.1       | 0.1       | 0.1       | 0.2       |
| Bacteroidia; Cryomorphaceae                 | 0.1             | 0.2       | 0.2       | 0.3       | 0.2       | 0.3       | 0            | 0         | 0.2       | 0.2       | 0.2       | 0.1       | 0.4       | 0.5       |
|                                             | Sample 1-       | Sample 2- | Sample 3- | Sample 4- | Sample 5- | Sample 6- | Sample 1+    | Sample 2+ | Sample 1- | Sample 2- | Sample 3- | Sample 4- | Sample 5- | Sample 6- |

**Supplementary file 8:** Top 45 family ranked heatmap (and showing their classes). Separated by samplings events (before stocking and peak biomass). Values and color represent the % read abundance, where red = high abundance and white = low abundance.

Surface layer

|                                               | Core     |          |          |          |          |          | Peak     |          |           |           |           |           |           |           |
|-----------------------------------------------|----------|----------|----------|----------|----------|----------|----------|----------|-----------|-----------|-----------|-----------|-----------|-----------|
|                                               | Core     |          |          |          |          |          | Peak     |          |           |           |           |           |           |           |
| Deltaproteobacteria; Desulfobulbaceae         | 2.2      | 1.6      | 1.9      | 9        | 0.2      | 9.5      | 6.6      | 9.7      | 10.7      | 9.4       | 9.6       | 9.6       | 7.4       | 5.2       |
| Bacteroidia; Flavobacteriaceae                | 5.6      | 5.6      | 5.4      | 6.8      | 7.2      | 7.4      | 4.1      | 5.6      | 7         | 8.8       | 5.8       | 6.1       | 10.2      | 2.5       |
| Planctomycetia; Planellulaceae                | 6.4      | 4.8      | 8.3      | 6.8      | 6.1      | 5.6      | 1.3      | 2.6      | 5         | 5.5       | 4.1       | 5.9       | 4.9       | 2.2       |
| Deltaproteobacteria; Desulfobulbaceae         | 3.8      | 6.4      | 5.4      | 4.1      | 4.7      | 4.5      | 3.7      | 4.7      | 4.9       | 5.4       | 5.8       | 5.9       | 3.4       | 1.6       |
| Campylobacteriia; Sulfurovaceae               | 8.1      | 3.9      | 4.7      | 1.9      | 4.4      | 1.8      | 5.7      | 7.3      | 6.5       | 5.8       | 3.8       | 3.7       | 1.5       | 0.3       |
| Gammaproteobacteria; Halieaceae               | 2.5      | 3.3      | 3.8      | 4.6      | 3.9      | 3.4      | 0.6      | 0.8      | 3.2       | 3.3       | 3.5       | 2.9       | 4         | 4.6       |
| Gammaproteobacteria; Unknown_Family           | 2.2      | 2.1      | 3.3      | 4.3      | 3.6      | 4.4      | 0.3      | 0.6      | 2         | 2.8       | 2.1       | 3.3       | 3.2       | 2.1       |
| Thermoanaerobactilia; Thermoanaerobactulaceae | 2.5      | 1.9      | 3.3      | 3.8      | 3.2      | 3.7      | 0.8      | 1.4      | 2.3       | 3         | 2.5       | 3.4       | 2.7       | 0.3       |
| Bacteroidia; Bacteroidetes_BD2-2              | 3.7      | 3        | 1.7      | 1.3      | 2.6      | 1.3      | 2.3      | 3.4      | 4         | 2.8       | 2.9       | 2.2       | 1.5       |           |
| Kiritimallaei; Kiritimallaeaceae              | 1.4      | 1.3      | 0.7      | 0.8      | 1        | 1.3      | 1        | 3.4      | 2.8       | 2.5       | 2.2       | 2.3       | 2.6       | 1.9       |
| Gammaproteobacteria; Thiomicrospiraceae       | 1.8      | 1.9      | 1.4      | 1        | 2.5      | 1.5      | 1        | 1.5      | 2.5       | 3.2       | 3.2       | 2.3       | 1.4       | 0.4       |
| Gammaproteobacteria; Spongibacteriaceae       | 1.6      | 3.1      | 1.3      | 1.8      | 1.4      | 1.6      | 0.3      | 0.4      | 2.1       | 1.5       | 2.3       | 1.7       | 1.6       | 1.8       |
| Bacteroidia; Lentimicrobiaceae                | 2.6      | 2.3      | 1.5      | 1        | 1.3      | 0.8      | 1.4      | 2.4      | 2.8       | 2         | 1.8       | 1.6       | 0.9       | 0.6       |
| Acidimicrobia; Illumatobacteriaceae           | 1.7      | 1.5      | 2        | 2.2      | 1.8      | 1.6      | 0.2      | 0.5      | 1.3       | 1.4       | 1.5       | 1.4       | 2.8       | 1.8       |
| Spirochaetia; Spirochaetaceae                 | 0.9      | 0.8      | 0.3      | 0.3      | 0.4      | 0.3      | 10       | 8.3      | 1.1       | 1         | 1         | 0.8       | 0.8       | 0.6       |
| Bacteroidia; Prolixibacteriaceae              | 2        | 2        | 0.8      | 0.5      | 0.7      | 0.4      | 1.6      | 2.3      | 1.4       | 1.1       | 1.1       | 0.8       | 0.5       | 1         |
| Bacteroidia; Cyctobacteriaceae                | 0.7      | 1.2      | 0.9      | 1.7      | 1.3      | 1.2      | 0.2      | 0.2      | 1.2       | 1.2       | 1.3       | 1.2       | 2.3       | 1.3       |
| Gammaproteobacteria; Sedimenticolaceae        | 1.1      | 0.9      | 1.3      | 1.1      | 1.3      | 1.6      | 0.5      | 0.8      | 1.4       | 1.7       | 1.4       | 1.9       | 1.1       | 0.2       |
| Gammaproteobacteria; Psychromonadaceae        | 0.1      | 0.2      | 0        | 0.1      | 0.1      | 1.4      | 7.2      | 3.5      | 0.2       | 0.4       | 0.7       | 0.5       | 0.8       | 2.5       |
| Bacteroidia; Marinifilaceae                   | 0.1      | 0.1      | 0        | 0.1      | 0.1      | 0.4      | 7.5      | 5.3      | 0.2       | 0.3       | 0.3       | 0.4       | 0.5       | 0.5       |
| Gammaproteobacteria; Colwelliaceae            | 0.1      | 0.1      | 0        | 0.1      | 0.1      | 0.4      | 0.1      | 0.1      | 0.5       | 0.7       | 0.6       | 1.4       | 9         |           |
| Verrucomicrobiae; Rubritellaceae              | 0.6      | 0.5      | 0.6      | 0.8      | 0.7      | 0.7      | 0.4      | 0.7      | 1         | 1.4       | 0.9       | 1.3       | 1.2       | 1.1       |
| Alphaproteobacteria; Rhodobacteriaceae        | 1        | 0.9      | 0.7      | 1.2      | 1        | 1.2      | 0.2      | 0.2      | 0.4       | 0.6       | 0.5       | 0.6       | 1.7       | 1.2       |
| Gammaproteobacteria; Ectothiorhodospiraceae   | 0.4      | 0.6      | 0.7      | 0.8      | 0.8      | 0.8      | 0.1      | 0.3      | 1         | 1         | 1.2       | 1.2       | 0.8       | 0.3       |
| Anaerolineae; Caldilineaceae                  | 0.9      | 0.9      | 1        | 0.6      | 0.7      | 0.8      | 0.3      | 0.5      | 0.9       | 0.7       | 0.8       | 0.8       | 0.7       | 0.3       |
| Bacteroidia; Crocinitomacaceae                | 0.5      | 0.6      | 0.6      | 0.9      | 0.7      | 0.8      | 0.1      | 0.1      | 0.7       | 0.5       | 0.7       | 0.6       | 1.2       | 0.7       |
| Deltaproteobacteria; Sandaracinaceae          | 0.4      | 0.6      | 0.9      | 1        | 0.7      | 1        | 0.1      | 0.1      | 0.5       | 0.5       | 0.7       | 0.8       | 0.3       | 0.3       |
| Anaerolineae; Anaerolineaceae                 | 0.6      | 0.5      | 1        | 1.2      | 0.8      | 0.7      | 0.3      | 0.3      | 0.7       | 0.5       | 0.4       | 0.6       | 0.4       | 1         |
| Bacteroidia; Cryomorphaceae                   | 0.3      | 0.5      | 0.3      | 0.8      | 0.5      | 0.5      | 0.2      | 0.1      | 0.5       | 0.4       | 0.4       | 0.4       | 1.2       | 1.5       |
| Gammaproteobacteria; Thiotrichaceae           | 0.3      | 0.6      | 0.3      | 0.5      | 0.6      | 1.3      | 0.2      | 0.2      | 0.4       | 0.6       | 0.5       | 0.7       | 0.8       | 0.6       |
| Gammaproteobacteria; Chromatiaceae            | 0.4      | 0.5      | 0.5      | 0.4      | 0.5      | 0.6      | 0.1      | 0.3      | 0.6       | 0.7       | 1         | 0.8       | 0.6       | 0         |
| Bacteroidia; Saprospiraceae                   | 0.3      | 0.6      | 0        | 0.4      | 0.3      | 0.4      | 0.1      | 0.1      | 0.6       | 0.3       | 0.7       | 0.3       | 0.7       | 0.7       |
| Verrucomicrobiae; DEV007                      | 0.5      | 0.4      | 0.6      | 0.7      | 0.6      | 0.6      | 0        | 0.1      | 0.2       | 0.3       | 0.2       | 0.3       | 0.5       | 0.2       |
| Deltaproteobacteria; Sva1033                  | 0.2      | 0.3      | 0.4      | 0.4      | 0.4      | 0.5      | 0        | 0.1      | 0.2       | 0.4       | 0.3       | 0.5       | 0.7       | 0.6       |
| Mollicutes; Izimiplasmataceae                 | 0.1      | 0.2      | 0        | 0        | 0.1      | 0.1      | 1.3      | 1.6      | 0.2       | 0.3       | 0.3       | 0.2       | 0.2       | 0.6       |
| Bacteroidia; Marinifilabaceae                 | 0.3      | 0.3      | 0        | 0.1      | 0.2      | 0.1      | 0.7      | 0.8      | 0.4       | 0.3       | 0.4       | 0.2       | 0.5       | 0.5       |
| Gammaproteobacteria; Thiohalorhabdaceae       | 0.3      | 0.5      | 0.2      | 0.7      | 0.5      | 0.5      | 0        | 0        | 0.1       | 0.1       | 0.1       | 0.1       | 0.5       | 0.7       |
| Deltaproteobacteria; Desulfurulaceae          | 0.4      | 0.5      | 0.4      | 0.4      | 0.5      | 0.4      | 0.2      | 0.2      | 0.3       | 0.2       | 0.3       | 0.3       | 0.2       | 0.1       |
| Acidimicrobia; Microthricaceae                | 0.4      | 0.4      | 0.5      | 0.5      | 0.4      | 0.5      | 0        | 0        | 0.2       | 0.2       | 0.3       | 0.3       | 0.2       | 0.2       |
| Clostridia; Lachnospiraceae                   | 0.1      | 0        | 0        | 0.1      | 0.1      | 0.3      | 1.8      | 1.6      | 0         | 0         | 0.1       | 0.1       | 0.1       | 0.5       |
| Deltaproteobacteria; Desulfurimonadaceae      | 0.2      | 0.3      | 0.3      | 0.2      | 0.3      | 0.1      | 0.2      | 0.2      | 0.4       | 0.5       | 0.6       | 0.3       | 0.3       | 0.3       |
| Deltaproteobacteria; Bacteriovoraceae         | 0.3      | 0.6      | 0        | 0.3      | 0.3      | 0.2      | 0.2      | 0.1      | 0.2       | 0.1       | 0.3       | 0.1       | 0.4       | 0.7       |
| Ignitavibacteria; Melioribacteriaceae         | 0.4      | 0.5      | 0.3      | 0.1      | 0.4      | 0.2      | 0.2      | 0.4      | 0.3       | 0.2       | 0.3       | 0.1       | 0.1       | 0         |
| Thermoleophilii; 67-14                        | 0.2      | 0.1      | 0.5      | 0.4      | 0.2      | 0.3      | 0        | 0        | 0.2       | 0.2       | 0.2       | 0.3       | 0.2       | 0.3       |
| Clostridia; Desulfuillatellaceae              | 0.1      | 0.1      | 0        | 0        | 0        | 0.1      | 1.3      | 1.5      | 0.2       | 0.1       | 0.1       | 0.1       | 0.1       | 0.1       |
| Alphaproteobacteria; Methylophilgellaceae     | 0.2      | 0.2      | 0.5      | 0.4      | 0.3      | 0.3      | 0        | 0        | 0.2       | 0.2       | 0.2       | 0.3       | 0.3       | 0.2       |
| Gammaproteobacteria; Arenicellaceae           | 0.3      | 0.3      | 0.2      | 0.3      | 0.2      | 0.2      | 0        | 0        | 0.2       | 0.3       | 0.4       | 0.2       | 0.3       | 0.3       |
| Cloacimonadia; MSLB1                          | 0.2      | 0.3      | 0        | 0        | 0        | 0.1      | 1.1      | 1.2      | 0.2       | 0.1       | 0.1       | 0.1       | 0.1       | 0         |
| Clostridia; Ruminococcaceae                   | 0.2      | 0.3      | 0        | 0.1      | 0.1      | 0.1      | 0.5      | 1        | 0.2       | 0.2       | 0.2       | 0.1       | 0.1       | 0.1       |
| Campylobacteriia; Thiouulaceae                | 0.2      | 0.2      | 0.1      | 0.1      | 0.1      | 0.1      | 0.8      | 0.4      | 0.2       | 0.3       | 0.2       | 0.2       | 0.1       | 0.1       |
| Sample 1                                      | Sample 2 | Sample 3 | Sample 4 | Sample 5 | Sample 6 | Sample 7 | Sample 8 | Sample 9 | Sample 10 | Sample 11 | Sample 12 | Sample 13 | Sample 14 | Sample 15 |

3 cm depth layer

|                                            | Before stocking |          |          |          |          |          | Peak domain |          |          |          |          |          |          |          |          |          |          |   |
|--------------------------------------------|-----------------|----------|----------|----------|----------|----------|-------------|----------|----------|----------|----------|----------|----------|----------|----------|----------|----------|---|
| Deltaproteobacteria; Desulfobulbaceae      | 3               | 2        | 2        | 1        | 2        | 0        | 8           | 7        | 9        | 1        | 5        | 0        | 6        | 2        | 9        | 0        | 8        | 9 |
| Planctomycetia; Planellulaceae             | 5               | 8        | 5        | 6        | 8        | 3        | 7           | 6        | 5        | 5        | 6        | 1        | 6        | 7        | 4        | 3        | 7        | 8 |
| Deltaproteobacteria; Desulfobacteraceae    | 8               | 3        | 7        | 5        | 6        | 5        | 4           | 7        | 4        | 9        | 6        | 5        | 8        | 4        | 8        | 1        | 6        | 7 |
| Campylobacteria; Sulfohalobaceae           | 5               | 6        | 5        | 8        | 3        | 9        | 1           | 8        | 5        | 7        | 2        | 9        | 4        | 3        | 1        | 9        | 0        | 6 |
| Bacteroidia; Flavobacteriaceae             | 3               | 3        | 4        | 8        | 4        | 9        | 4           | 1        | 8        | 4        | 7        | 7        | 3        | 9        | 4        | 6        | 2        | 6 |
| Thermoanaerobactia; Thermoanaerobactaceae  | 2               | 9        | 2        | 8        | 4        | 4        | 6           | 3        | 2        | 3        | 1        | 5        | 5        | 5        | 4        | 9        | 5        | 1 |
| Gammaproteobacteria; Unknown_Family        | 1               | 4        | 1        | 6        | 3        | 5        | 3           | 8        | 2        | 3        | 5        | 0        | 5        | 1        | 4        | 2        | 8        | 2 |
| Bacteroidia; Bacteroidetes_BD2-2           | 4               | 2        | 3        | 9        | 1        | 7        | 1           | 5        | 3        | 3        | 1        | 2        | 1        | 3        | 9        | 2        | 1        | 5 |
| Gammaproteobacteria; Haaliaceae            | 1               | 1        | 1        | 6        | 3        | 2        | 9           | 2        | 2        | 4        | 9        | 0        | 1        | 4        | 0        | 2        | 3        | 9 |
| Acidimicrobia; Illumatobacteriaceae        | 1               | 1        | 1        | 2        | 2        | 1        | 2           | 1        | 4        | 1        | 6        | 0        | 3        | 1        | 4        | 1        | 2        | 4 |
| Bacteroidia; Lentimicrobiaceae             | 3               | 1        | 3        | 1        | 2        | 1        | 1           | 9        | 1        | 1        | 7        | 2        | 3        | 1        | 6        | 1        | 7        | 9 |
| Gammaproteobacteria; Sedimentibacteriaceae | 0               | 7        | 0        | 8        | 1        | 1        | 3           | 1        | 5        | 1        | 4        | 0        | 7        | 2        | 4        | 1        | 1        | 9 |
| Spirochaeta; Spirochaetaceae               | 1               | 2        | 1        | 0        | 2        | 0        | 3           | 0        | 3        | 0        | 2        | 1        | 1        | 3        | 0        | 4        | 0        | 5 |
| Anaerolineae; Anaerolineaceae              | 1               | 5        | 1        | 2        | 1        | 3        | 1           | 5        | 1        | 3        | 1        | 0        | 3        | 1        | 2        | 9        | 0        | 7 |
| Gammaproteobacteria; Thiomicrospiraceae    | 1               | 3        | 1        | 6        | 0        | 7        | 1           | 6        | 2        | 1        | 5        | 1        | 8        | 1        | 0        | 7        | 1        | 0 |
| Anaerolineae; Caldilineaceae               | 1               | 5        | 1        | 3        | 1        | 2        | 1           | 2        | 1        | 2        | 0        | 9        | 0        | 5        | 1        | 8        | 1        | 1 |
| Gammaproteobacteria; Spongiibacteraceae    | 0               | 9        | 1        | 2        | 1        | 3        | 1           | 4        | 1        | 2        | 1        | 4        | 0        | 5        | 0        | 4        | 0        | 6 |
| Bacteroidia; Prolixobacteriaceae           | 1               | 6        | 2        | 2        | 0        | 7        | 1           | 5        | 1        | 0        | 5        | 2        | 6        | 0        | 9        | 0        | 7        | 0 |
| Kiritimatiellae; Kiritimatiellaceae        | 1               | 3        | 1        | 5        | 0        | 7        | 0           | 6        | 0        | 9        | 0        | 8        | 1        | 7        | 0        | 6        | 0        | 5 |
| Bacteroidia; Cyclobacteriaceae             | 0               | 4        | 0        | 6        | 0        | 8        | 1           | 2        | 1        | 1        | 1        | 0        | 1        | 0        | 5        | 0        | 4        | 0 |
| Deltaproteobacteria; Sandaracinaceae       | 0               | 4        | 0        | 4        | 1        | 1        | 1           | 0        | 5        | 0        | 9        | 0        | 1        | 0        | 2        | 0        | 7        | 0 |
| Bacteroidia; Marinifilaceae                | 0               | 1        | 0        | 1        | 0        | 1        | 0           | 1        | 0        | 1        | 0        | 7        | 2        | 0        | 2        | 0        | 1        | 0 |
| Gammaproteobacteria; Ecotiorhodospiraceae  | 0               | 3        | 0        | 3        | 0        | 7        | 0           | 9        | 0        | 6        | 0        | 7        | 0        | 2        | 0        | 3        | 0        | 6 |
| Verrucomicrobiae; Rubritellaceae           | 0               | 4        | 0        | 4        | 0        | 6        | 0           | 6        | 0        | 4        | 0        | 6        | 0        | 2        | 0        | 3        | 0        | 6 |
| Gammaproteobacteria; Thiotrichaceae        | 0               | 2        | 0        | 2        | 0        | 2        | 0           | 7        | 0        | 9        | 1        | 3        | 0        | 2        | 0        | 3        | 0        | 3 |
| Acidimicrobia; Microthricaceae             | 0               | 3        | 0        | 6        | 0        | 5        | 0           | 3        | 0        | 4        | 0        | 0        | 2        | 0        | 2        | 0        | 7        | 0 |
| Thermoplasma; 67-14                        | 0               | 2        | 0        | 2        | 0        | 6        | 0           | 5        | 0        | 2        | 0        | 3        | 0        | 1        | 0        | 2        | 0        | 9 |
| Alphaproteobacteria; Rhodobacteraceae      | 0               | 3        | 0        | 4        | 0        | 7        | 0           | 5        | 0        | 4        | 1        | 0        | 2        | 0        | 3        | 0        | 2        | 0 |
| Deltaproteobacteria; Desulfurcalaceae      | 0               | 6        | 0        | 5        | 0        | 4        | 0           | 4        | 0        | 5        | 0        | 4        | 0        | 2        | 0        | 5        | 0        | 3 |
| Verrucomicrobiae; DEV007                   | 0               | 3        | 0        | 3        | 0        | 6        | 0           | 6        | 0        | 3        | 0        | 5        | 0        | 1        | 0        | 2        | 0        | 2 |
| Alphaproteobacteria; Methylophilaceae      | 0               | 2        | 0        | 2        | 0        | 5        | 0           | 4        | 0        | 2        | 0        | 3        | 0        | 1        | 0        | 1        | 0        | 7 |
| Bacteroidia; Crocinomitaceae               | 0               | 2        | 0        | 2        | 0        | 6        | 0           | 5        | 0        | 3        | 0        | 7        | 0        | 1        | 0        | 1        | 0        | 5 |
| Gammaproteobacteria; Chromatiaceae         | 0               | 2        | 0        | 2        | 0        | 3        | 0           | 5        | 0        | 4        | 0        | 5        | 0        | 3        | 0        | 2        | 0        | 3 |
| Deltaproteobacteria; Sva1033               | 0               | 3        | 0        | 2        | 0        | 5        | 0           | 5        | 0        | 4        | 0        | 4        | 0        | 1        | 0        | 1        | 0        | 1 |
| Bacteroidia; Mainilabiaceae                | 0               | 7        | 0        | 5        | 0        | 1        | 0           | 2        | 0        | 5        | 0        | 3        | 1        | 0        | 3        | 0        | 1        | 0 |
| Cloacimonadia; MSLB1                       | 1               | 1        | 0        | 9        | 0        | 0        | 0           | 0        | 5        | 0        | 1        | 0        | 1        | 3        | 0        | 2        | 0        | 1 |
| Clostridia; Defluviitaleaceae              | 0               | 4        | 0        | 2        | 0        | 0        | 0           | 1        | 0        | 1        | 0        | 2        | 2        | 0        | 1        | 0        | 1        | 0 |
| Clostridia; Ruminococcaceae                | 0               | 7        | 0        | 6        | 0        | 0        | 2           | 0        | 4        | 0        | 1        | 0        | 6        | 0        | 2        | 0        | 4        | 0 |
| Clostridia; Lachnospiraceae                | 0               | 1        | 0        | 1        | 0        | 1        | 0           | 1        | 0        | 5        | 2        | 5        | 0        | 1        | 0        | 1        | 0        | 1 |
| Ignavibacteria; Melioribacteriaceae        | 0               | 3        | 0        | 5        | 0        | 2        | 0           | 1        | 0        | 3        | 0        | 2        | 0        | 2        | 0        | 7        | 0        | 1 |
| Alphaproteobacteria; Hyphomicrobiaceae     | 0               | 1        | 0        | 1        | 0        | 4        | 0           | 3        | 0        | 2        | 0        | 0        | 1        | 0        | 1        | 0        | 6        | 2 |
| Latescibacteria; Latescibacteraceae        | 0               | 3        | 0        | 2        | 0        | 1        | 0           | 3        | 0        | 3        | 0        | 2        | 0        | 1        | 0        | 4        | 0        | 2 |
| Gammaproteobacteria; Thiohalorhabdaceae    | 0               | 2        | 0        | 2        | 0        | 3        | 0           | 3        | 0        | 3        | 0        | 0        | 1        | 0        | 1        | 0        | 1        | 0 |
| Calditricha; Caldithrichaceae              | 0               | 2        | 0        | 2        | 0        | 0        | 2           | 0        | 4        | 0        | 3        | 0        | 1        | 0        | 1        | 0        | 3        | 0 |
| Deltaproteobacteria; Desulfurimonadaceae   | 0               | 4        | 0        | 3        | 0        | 2        | 0           | 3        | 0        | 4        | 0        | 1        | 0        | 1        | 0        | 1        | 0        | 3 |
| Gammaproteobacteria; Psychromonadaceae     | 0               | 0        | 0        | 1        | 0        | 0        | 0           | 0        | 1        | 1        | 3        | 0        | 0        | 0        | 1        | 0        | 0        | 1 |
| Deltaproteobacteria; Syntrophobacteraceae  | 0               | 0        | 0        | 3        | 0        | 2        | 0           | 1        | 0        | 1        | 0        | 0        | 0        | 8        | 0        | 2        | 0        | 2 |
| Bacteroidia; Saprospiraceae                | 0               | 4        | 0        | 3        | 0        | 1        | 0           | 1        | 0        | 3        | 0        | 3        | 0        | 1        | 0        | 1        | 0        | 1 |
| Moduliflexia; Moduliflexaceae              | 0               | 1        | 0        | 1        | 0        | 2        | 0           | 2        | 0        | 1        | 0        | 1        | 0        | 1        | 0        | 2        | 0        | 2 |
| Bacteroidia; Bacteroidaceae                | 0               | 0        | 0        | 0        | 0        | 0        | 0           | 0        | 0        | 0        | 2        | 1        | 0        | 0        | 0        | 0        | 0        | 0 |
| Sample 1                                   | Sample 2        | Sample 3 | Sample 4 | Sample 5 | Sample 6 | Sample 1 | Sample 2    | Sample 3 | Sample 4 | Sample 5 | Sample 6 | Sample 1 | Sample 2 | Sample 3 | Sample 4 | Sample 5 | Sample 6 |   |

10 cm depth layer

|          |                                               | Before stocking |     |      |     |     | High biomass |          |     |     |     |     |     |     |     |
|----------|-----------------------------------------------|-----------------|-----|------|-----|-----|--------------|----------|-----|-----|-----|-----|-----|-----|-----|
| 1        | Deltaproteobacteria; Desulfobacteraceae       | 7.8             | 7.6 | 5.7  | 6.8 | 7.4 | 7.1          | 6.7      | 6.7 | 6.8 | 8.1 | 6.9 | 6.9 | 5.4 |     |
| 2        | Deltaproteobacteria; Desulfobulbaceae         | 6.4             | 6.2 | 12.8 | 6   | 7   | 8            | 5.3      | 5.4 | 1.8 | 7.2 | 3.9 | 6.9 | 6   | 5.9 |
| 3        | Thermoanaerobaculum; Thermoanaerobaculaceae   | 5.3             | 6.9 | 3.9  | 6.7 | 7   | 6.6          | 6.9      | 3.6 | 2.8 | 1.4 | 3   | 4.7 | 6.5 | 2.9 |
| 4        | Planctomycetia; Planctomycetaceae             | 5.4             | 5.8 | 7.4  | 5.7 | 6.2 | 6.3          | 2.5      | 2.1 | 1.7 | 3.5 | 2.4 | 3.9 | 5.2 | 3.2 |
| 5        | Anaerolineae; Anaerolineaceae                 | 3.9             | 3.9 | 1    | 4.6 | 4.2 | 3.5          | 3        | 3.5 | 3.6 | 2.6 | 3.4 | 2.9 | 3.6 | 3.3 |
| 6        | Bacteroidia; Bacteroidetes; B2D-2             | 1.3             | 1.2 | 1.2  | 1.2 | 1.4 | 1.8          | 1.6      | 1   | 1   | 1.1 | 1.4 | 1.4 | 1.1 | 1.5 |
| 7        | Deltaproteobacteria; Syntrophobacteraceae     | 1.7             | 1.7 | 0.2  | 1.3 | 1.2 | 0.6          | 0.7      | 1.7 | 0.1 | 1   | 2.6 | 1   | 1   | 1.7 |
| 8        | Gammaproteobacteria; Unknown_Family           | 1.2             | 1.1 | 3.4  | 1.6 | 1.3 | 2.9          | 0.8      | 0.3 | 0.2 | 1.2 | 0.2 | 1.5 | 1.4 | 0.8 |
| 9        | Gammaproteobacteria; Thiotrichaceae           | 1.2             | 0.8 | 0.4  | 1.1 | 1.1 | 1.6          | 1        | 0.9 | 1   | 1.7 | 1.2 | 2.2 | 1.6 | 1.3 |
| 10       | Bacteroidia; Flavobacteriaceae                | 0.5             | 0.6 | 5.8  | 0.7 | 0.4 | 1.3          | 1.2      | 0.4 | 0.3 | 1.8 | 0.2 | 1.3 | 0.6 | 1.2 |
| 11       | Gammaproteobacteria; Halaeaceae               | 0.9             | 1.1 | 3.1  | 1.7 | 1.5 | 1.4          | 0.7      | 0.2 | 0.1 | 1.5 | 0.3 | 1.7 | 1.6 | 0.6 |
| 12       | Deltaproteobacteria; Desulfurcalaceae         | 0.9             | 0.9 | 0.4  | 0.5 | 0.9 | 1            | 0.8      | 1.1 | 1.5 | 1.7 | 1.4 | 1.2 | 0.8 | 1.2 |
| 13       | Phycisphaerae; SG8-4                          | 0.7             | 0.7 | 0.1  | 0.5 | 0.7 | 0.3          | 1.9      | 1.8 | 2.4 | 1   | 1.8 | 0.7 | 0.5 | 1.7 |
| 14       | Calditrichia; Calditrichaceae                 | 0.9             | 0.8 | 0.1  | 0.6 | 0.7 | 0.8          | 1.1      | 1.4 | 1.3 | 0.7 | 1.4 | 0.8 | 0.8 | 1.4 |
| 15       | Acidimicrobia; Ilumatobacteriaceae            | 1.1             | 1.1 | 1.8  | 1.2 | 1.1 | 1.1          | 0.7      | 0.2 | 0.1 | 0.8 | 0.4 | 1   | 1.6 | 0.7 |
| 16       | Campylobacteria; Sulfurovaceae                | 0.2             | 0.2 | 0.3  | 0.5 | 0.4 | 0.1          | 1.5      | 1.3 | 0.4 | 0.2 | 2.2 | 0.1 | 1.3 | 0.3 |
| 17       | Thermoleptothrix; 67-114                      | 1.2             | 1.2 | 0.3  | 1.1 | 0.9 | 1            | 0.6      | 0.8 | 0.6 | 0.7 | 1.1 | 0.8 | 1.1 | 0.6 |
| 18       | Gammaproteobacteria; Ectothiorhodospiraceae   | 1.1             | 0.7 | 0.6  | 1   | 0.8 | 0.9          | 1        | 0.6 | 0.4 | 1   | 0.8 | 1.3 | 1   | 0.6 |
| 19       | Deltaproteobacteria; Sandaracinaceae          | 0.9             | 0.7 | 0.8  | 0.8 | 0.8 | 0.6          | 0.3      | 0.6 | 0.5 | 0.7 | 0.7 | 0.9 | 1.3 | 0.5 |
| 20       | Alphaproteobacteria; Methylotigellaceae       | 0.9             | 1   | 0.4  | 0.9 | 0.6 | 0.9          | 0.5      | 0.7 | 0.9 | 0.6 | 1.5 | 0.5 | 0.9 | 0.6 |
| 21       | Gammaproteobacteria; Sedimenticolaceae        | 0.7             | 0.7 | 1.3  | 0.9 | 0.8 | 1.2          | 0.8      | 0.3 | 0.2 | 1.2 | 0.4 | 1.5 | 1   | 0.5 |
| 22       | Latescibacteria; Latescibacteriaceae          | 0.8             | 0.8 | 0.1  | 0.7 | 0.9 | 0.5          | 0.8      | 0.9 | 0.9 | 0.7 | 0.8 | 0.7 | 0.7 | 0.9 |
| 23       | Alphaproteobacteria; Hyphomicrobiaceae        | 0.8             | 0.8 | 0.3  | 0.7 | 0.6 | 0.5          | 0.5      | 1   | 1.1 | 0.5 | 1.3 | 0.4 | 0.6 | 0.5 |
| 24       | Gammaproteobacteria; Thiomicrospiraceae       | 0.3             | 0.3 | 1.5  | 0.5 | 0.3 | 1            | 1.1      | 0.2 | 0.1 | 1.8 | 0.1 | 1.6 | 0.4 | 0.4 |
| 25       | Spirochaetia; Spirochaetaceae                 | 0.5             | 0.6 | 0.3  | 0.4 | 0.5 | 0.3          | 1.1      | 0.7 | 0.9 | 0.7 | 0.7 | 0.5 | 0.4 | 0.9 |
| 26       | Acidimicrobia; Microtrichaceae                | 0.7             | 0.8 | 0.5  | 0.8 | 0.7 | 0.6          | 0.4      | 0.4 | 0.2 | 0.5 | 0.5 | 0.5 | 0.6 | 0.2 |
| 27       | Anaerolineae; Caldilineaceae                  | 0.4             | 0.5 | 1.2  | 0.7 | 0.7 | 0.8          | 0.3      | 0.2 | 0.1 | 0.5 | 0.2 | 0.5 | 0.9 | 0.4 |
| 28       | Bacteroidia; Lentimicrobiaceae                | 0.3             | 0.3 | 1.6  | 0.3 | 0.4 | 0.6          | 0.6      | 0.3 | 0.2 | 0.8 | 0.2 | 0.6 | 0.3 | 0.4 |
| 29       | Bacteroidia; Cyclobacteriaceae                | 0.4             | 0.4 | 1    | 0.4 | 0.4 | 0.8          | 0.2      | 0.2 | 0.2 | 0.5 | 0.2 | 0.4 | 0.6 | 0.6 |
| 30       | Gammaproteobacteria; Spongibacteriaceae       | 0.3             | 0.3 | 1.4  | 0.6 | 0.4 | 0.6          | 0.2      | 0   | 0.1 | 0.6 | 0.1 | 0.6 | 0.5 | 0.3 |
| 31       | Gammaproteobacteria; Chromatiales             | 0.4             | 0.3 | 0.3  | 0.4 | 0.5 | 0.5          | 0.4      | 0.2 | 0.1 | 0.6 | 0.2 | 0.8 | 0.6 | 0.3 |
| 32       | Kiritimatiellae; Kiritimatiellaceae           | 0.4             | 0.3 | 0.7  | 0.2 | 0.3 | 0.3          | 0.3      | 0.3 | 0.1 | 1   | 0.1 | 0.4 | 0.3 | 0.5 |
| 33       | Gammaproteobacteria; Thioalkalipiraceae       | 0.4             | 0.2 | 0    | 0.2 | 0.2 | 0.1          | 0.3      | 0.6 | 0.5 | 0.3 | 0.6 | 0.3 | 0.2 | 0.6 |
| 34       | Ignavibacteria; PHOS-HE36                     | 0.4             | 0.3 | 0    | 0.2 | 0.2 | 0.3          | 0.3      | 0.5 | 0.4 | 0.3 | 0.4 | 0.3 | 0.5 | 0.5 |
| 35       | Fibrobacteria; TG3                            | 0.2             | 0.2 | 0    | 0.1 | 0.2 | 0            | 0.2      | 0.5 | 0.7 | 0.4 | 0.4 | 0.3 | 0.3 | 0.5 |
| 36       | Gammaproteobacteria; Woeseiaceae              | 0.6             | 0.4 | 0.1  | 0.3 | 0.4 | 0.4          | 0.4      | 0.2 | 0.1 | 0.2 | 0.2 | 0.3 | 0.4 | 0.2 |
| 37       | Phycisphaerae; AKAU3564_sediment_group        | 0.3             | 0.3 | 0.1  | 0.2 | 0.2 | 0.1          | 0.4      | 0.4 | 0.5 | 0.2 | 0.4 | 0.2 | 0.1 | 0.5 |
| 38       | Gammaproteobacteria; Nitrosomonadaceae        | 0.3             | 0.3 | 0.1  | 0.2 | 0.3 | 0.2          | 0.2      | 0.4 | 0.4 | 0.2 | 0.4 | 0.2 | 0.2 | 0.3 |
| 39       | Modiflexia; Modiflexiaceae                    | 0.2             | 0.3 | 0.1  | 0.2 | 0.3 | 0.3          | 0.3      | 0.3 | 0.2 | 0.2 | 0.2 | 0.3 | 0.3 | 0.3 |
| 40       | Phycisphaerae; Phycisphaeraceae               | 0.4             | 0.3 | 0.1  | 0.3 | 0.3 | 0.2          | 0.2      | 0.2 | 0.3 | 0.2 | 0.2 | 0.2 | 0.3 | 0.2 |
| 41       | Gemmatimonadetes; Gemmatimonadaceae           | 0.3             | 0.2 | 0    | 0.2 | 0.3 | 0.1          | 0.2      | 0.2 | 0.3 | 0.2 | 0.4 | 0.2 | 0.2 | 0.3 |
| 42       | Bacteroidia; Polixibacteriaceae               | 0.1             | 0.2 | 1    | 0.1 | 0.1 | 0.1          | 0.3      | 0.1 | 0.1 | 0.6 | 0.1 | 0.2 | 0.1 | 0.3 |
| 43       | Bacteroidia; Mariniflabellaceae               | 0.2             | 0.2 | 0.1  | 0.2 | 0.2 | 0.2          | 0.3      | 0.2 | 0.2 | 0.3 | 0.2 | 0.2 | 0.3 | 0.4 |
| 44       | Deltaproteobacteria; MiDBa                    | 0.2             | 0.2 | 0.3  | 0.2 | 0.3 | 0.2          | 0.2      | 0.1 | 0.1 | 0.2 | 0.1 | 0.2 | 0.2 | 0.2 |
| 45       | Gammaproteobacteria; Thiohalohalobacteriaceae | 0.2             | 0.2 | 0.2  | 0.2 | 0.3 | 0.3          | 0.2      | 0.1 | 0.1 | 0.1 | 0.1 | 0.2 | 0.3 | 0.2 |
| 46       | Verrucomicrobiae; DEV007                      | 0.1             | 0.2 | 0.5  | 0.3 | 0.2 | 0.2          | 0.1      | 0.1 | 0.1 | 0   | 0.1 | 0.2 | 0.2 | 0.1 |
| 47       | Gammaproteobacteria; Arenicellaceae           | 0.2             | 0.2 | 0.1  | 0.2 | 0.2 | 0.1          | 0.2      | 0   | 0   | 0.3 | 0   | 0.3 | 0.4 | 0.2 |
| 48       | Phycisphaerae; 4572-13                        | 0.2             | 0.2 | 0.1  | 0.2 | 0.1 | 0.2          | 0.1      | 0.1 | 0.1 | 0.1 | 0.1 | 0.1 | 0.2 | 0.2 |
| 49       | Alphaproteobacteria; Rhodobacteraceae         | 0.1             | 0.2 | 0.6  | 0.2 | 0.1 | 0.1          | 0.2      | 0   | 0   | 0   | 0.1 | 0   | 0.1 | 0.1 |
| 50       | Deltaproteobacteria; Sva1033                  | 0.1             | 0.1 | 0.5  | 0.1 | 0.1 | 0.2          | 0.1      | 0.1 | 0   | 0.2 | 0.1 | 0.1 | 0.2 | 0.2 |
| Sample 1 |                                               | Sample 1        |     |      |     |     |              | Sample 1 |     |     |     |     |     |     |     |
| Sample 2 |                                               | Sample 2        |     |      |     |     |              | Sample 2 |     |     |     |     |     |     |     |
| Sample 3 |                                               | Sample 3        |     |      |     |     |              | Sample 3 |     |     |     |     |     |     |     |
| Sample 4 |                                               | Sample 4        |     |      |     |     |              | Sample 4 |     |     |     |     |     |     |     |
| Sample 5 |                                               | Sample 5        |     |      |     |     |              | Sample 5 |     |     |     |     |     |     |     |
| Sample 6 |                                               | Sample 6        |     |      |     |     |              | Sample 6 |     |     |     |     |     |     |     |

**Supplementary file 9:** Top 50 family ranked heatmap (and showing their classes) in a combined plot (surface layer = left, 3 cm depth layer = middle, 10 cm depth layer = right). Separated by samplings events (before stocking and peak biomass). Values and color represent the % read abundance, where red = high abundance and white = low abundance.



|                                         | Before stocking |            |            |            |            |            | Peak biomass |            |            |            |            |            |            |            |
|-----------------------------------------|-----------------|------------|------------|------------|------------|------------|--------------|------------|------------|------------|------------|------------|------------|------------|
| Flavobacteriaceae; Lutimonas -          | 43.2            | 41.3       | 54.2       | 46.7       | 45.2       | 40.1       | 25.5         | 40.8       | 47.9       | 49.6       | 48.3       | 53.2       | 48.3       | 28.4       |
| Flavobacteriaceae; Lutibacter -         | 10.3            | 11.9       | 9.8        | 10.3       | 7.9        | 11.6       | 41.4         | 29.2       | 18.7       | 16.6       | 14.6       | 10.9       | 9.2        | 20.6       |
| Flavobacteriaceae; Actibacter -         | 10.8            | 12.8       | 17.3       | 17.6       | 14.5       | 17.5       | 1.8          | 2.8        | 7.3        | 12.2       | 8.8        | 19.4       | 19.2       | 10.6       |
| Flavobacteriaceae; Arcticiflavibacter - | 4.4             | 3.6        | 6.1        | 6.2        | 5.8        | 2.1        | 5.5          | 4.1        | 4.6        | 6.8        | 2.4        | 3.6        | 2.5        | 1.7        |
| Flavobacteriaceae; Maribacter -         | 4.3             | 4.3        | 1.2        | 1.6        | 2.6        | 1.8        | 4.4          | 3.6        | 3.7        | 1.9        | 6.6        | 2          | 2.2        | 2.8        |
|                                         | Sample 1 -      | Sample 2 - | Sample 3 - | Sample 4 - | Sample 5 - | Sample 6 - | Sample 1 +   | Sample 2 + | Sample 1 - | Sample 2 - | Sample 3 - | Sample 4 - | Sample 5 - | Sample 6 - |

**Supplementary file 10:** Top 5 genus ranked heatmap of the family Flavobacteriaceae. Separated by samplings events (before stocking and peak biomass). Values and color represent the % read abundance, where red = high abundance and white = low abundance.
